# Supplementary material
Source: PubMed Central journal article supplement (PMC3818345)
Supplement: NIHMS477966-supplement-supplemental_data.pdf [file NIHMS477966-supplement-supplemental_data.pdf]

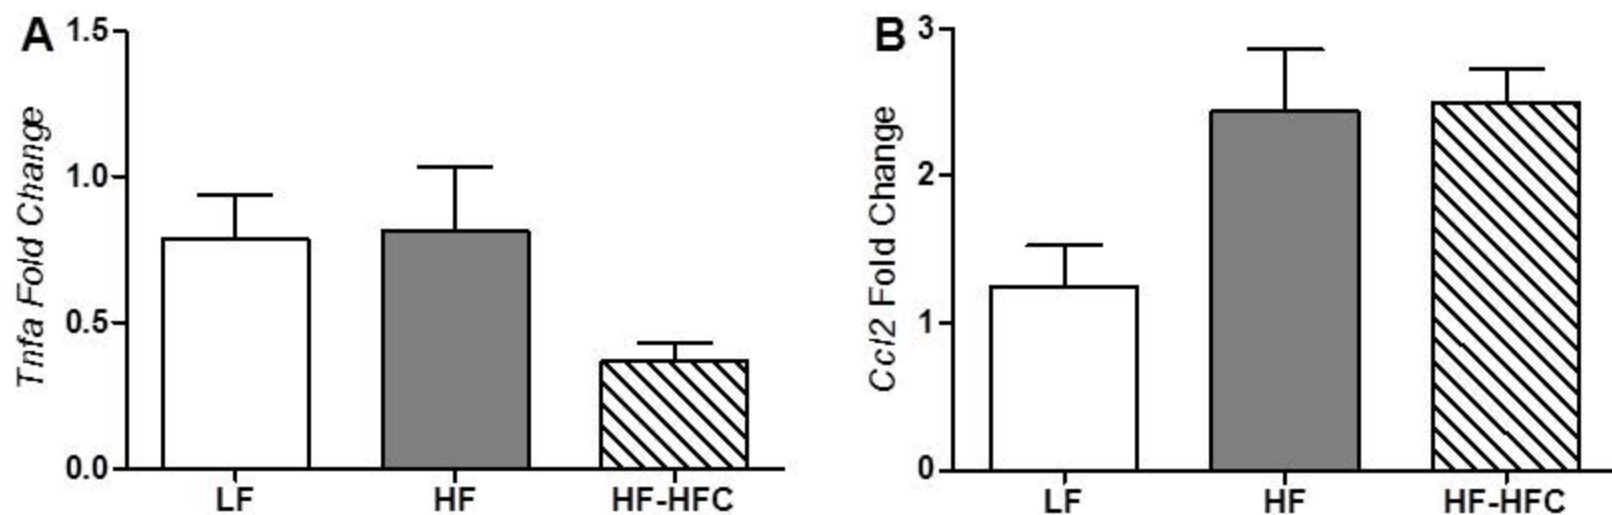

**Supplemental Figure 1.** Effect of cocoa supplementation on the expression of pro-inflammatory genes in SVF of WAT. Expression of (A) *Tnfa* and (B) *Ccl2* was determined at the end of the experiment using RNA isolated from the epididymal SVF from a set of representative mice from Exp 2. LF, n=10; HF, n=18; and HF-HFC, n=18. Values are expressed as mean  $\pm$  SEM. Means were compared to the HF-fed controls by one-way ANOVA with Dunnett's post-test.
